# Supplementary material
Source: MDPI journal article supplement (https://www.mdpi.com/2073-445X/12/9/1721)
Supplement: s1 [file s1]

Table S1 –Most cited papers in each of the analyzed periods. For the first and second periods, we present the top 5 most cited papers, and for the third and fourth periods, we illustrate the top 10 most cited papers. The numbers of citations refer only to citations made within the respective time period.

| Citation                                  | Journal                                         | N° of citations | Sensor System       | Indicator           | Region of interest | P |
|-------------------------------------------|-------------------------------------------------|-----------------|---------------------|---------------------|--------------------|---|
| (Graetz, Pech and Davis, 1988 [37])       | International Journal of Remote Sensing         | 118             | Landsat             | Land Cover          | Australia          | 1 |
| (Robinove <i>et al.</i> , 1981[49]))      | Remote Sensing of Environment                   | 93              | Landsat             | Albedo              | USA                |   |
| (Otterman, 1981 [50]))                    | Journal of Geophysical Research                 | 33              | Landsat             | Land Cover          | EUA                |   |
| (Graetz, 1987 [42]))                      | Remote Sensing of Environment                   | 31              | Landsat/AVHRR/Spot  | Land Cover          | Australia          |   |
| (Grazing, Sharma , 1989 [51]))            | Journal of the Indian Society of Remote Sensing | 12              | Landsat             | Land Cover          | India              |   |
| (Lambin and Ehrlich, 1997 [52]))          | Remote Sensing of Environment                   | 238             | AVHRR               | Land Cover          | Africa             | 2 |
| (Leeuwen, Huete e Laing, 1999 [53]))      | Remote Sensing of Environment                   | 179             | MODIS/AVHRR         | Land Cover          | Global             |   |
| (Pickup, Chewings and Nelson, 1993 [54])) | Remote Sensing of Environment                   | 141             | Landsat             | Land Cover          | Australia          |   |
| (Valle, Del <i>et al.</i> , 1998 [55]))   | Arid Research and Rehabilitation                | 118             | AVHRR               | Desertification     | Argentina          |   |
| (Pickup and Chewings, 1994 [56]))         | International Journal of Remote Sensing         | 99              | Landsat             | Land Cover/erosion  | Australia          |   |
| (Evans and Geerken, 2004 [57]))           | Journal of Arid Environments                    | 337             | AVHRR               | Land Cover/Rainfall | Syria              | 3 |
| (Asner and Lobell, 2000 [46]))            | Remote Sensing of Environment                   | 296             | Spectrometer/AVIRIS | Tec Paper           | Multi              |   |
| (Asner and Heidebrecht, 2002 [45]))       | International Journal of Remote Sensing         | 276             | Multi               | Tec Paper           | USA                |   |

|                                                        |                                                                          |     |                |                    |           |
|--------------------------------------------------------|--------------------------------------------------------------------------|-----|----------------|--------------------|-----------|
| (Ichii K., Kawabata A., 2002 [58])                     | International Journal of Remote Sensing                                  | 198 | AVHRR          | Land Cover/Climate | Global    |
| (Helldén and Tottrup, 2008 [59])                       | Global and Planetary Change                                              | 182 | AVHRR          | Desertification    | Global    |
| (Diouf and Lambin, 2001 [16])                          | Journal of Arid Environments                                             | 167 | AVHRR          | Land Cover         | Senegal   |
| (Russell-Smith <i>et al.</i> , 2007 [60])              | International Journal of Wildland Fire                                   | 148 | AVHRR          | Fire               | Australia |
| (Cao <i>et al.</i> , 2003 [61])                        | Global Change Biology                                                    | 137 | AVHRR          | Carbon             | China     |
| (Rasmussen, Fog and Madsen, 2001 [62])                 | Global Environmental Change                                              | 131 | SPOT/Aerial    | Desertification    | Burkina   |
| (Okin, Murray and Schlesinger, 2001 [63])              | Journal of Arid Environments                                             | 131 | AVIRIS/Landsat | Desertification    | USA       |
| (Dijk, Van and <i>et al.</i> , 2013 [47])              | Water Resources Research                                                 | 523 | Multi-Sensor   | Climate            | Australia |
| (Fensholt <i>et al.</i> , 2012 [64])                   | Remote Sensing of Environment                                            | 301 | AVHRR          | Vegetation Cover   | Global    |
| (Schulz <i>et al.</i> , 2010 [65])                     | Applied Geography                                                        | 176 | Landsat        | Land Cover         | Chile     |
| (Abd El-Kawy <i>et al.</i> , 2011 [66])                | Applied Geography                                                        | 164 | Landsat        | Land Cover         | Egypt     |
| (Gessner <i>et al.</i> , 2013 [67])                    | Global Planetary Change                                                  | 108 | AVHRR/GPCC     | Climate/Vegetation | Asia      |
| (Zhang <i>et al.</i> , 2013 [68])                      | International Journal of Applied Earth<br>Observation and Geoinformation | 103 | HJ-1           | Vegetation Cover   | China     |
| (Gebrehiwot, Veen, van der and Maathuis,<br>2011 [69]) | International Journal of Applied Earth<br>Observation and Geoinformation | 89  | SPOT           | Climate/Vegetation | Ethiopia  |
| (Guo <i>et al.</i> , 2012 [70])                        | Global Change Biology                                                    | 89  | AVHRR          | Climate/Vegetation | Eursia    |
| (Gao e Liu, 2010 [71])                                 | International Journal of Applied Earth<br>Observation and Geoinformation | 86  | Landsat        | Land Cover         | China     |

(Vicente-Serrano *et al.*, 2012 [72])

Ecological Monographs

81

Landsat

Aridity/Vegetation

Spain

---
